# Supplementary material
Source: publisher figshare collection journal article supplement (https://acs.figshare.com/ndownloader/files/9484339)
Supplement: Supplementary file 1 [file 9484339]

# Nanostructured Gold/Bismutite Hybrid Heterocatalysts for Plasmon-Enhanced Photosynthesis of Ammonia

Changlong Xiao,<sup>†,§</sup> Hong Hu,<sup>†,‡,§</sup> Xinyi Zhang<sup>\*,†</sup> and Douglas R. MacFarlane<sup>\*,†</sup>

<sup>†</sup> Australian Centre for Electromaterials Science, School of Chemistry, Monash University,  
Victoria, 3800 Australia

<sup>‡</sup>School of Chemistry, Nanjing Institute of Technology, Nanjing, China

## Corresponding Authors

<sup>\*</sup>Tel.: +61 3 9902 4618. Email: xinyi.zhang@monash.edu (X.Z.).

<sup>\*</sup>Tel.: +61 3 9905 4540. Email: douglas.macfarlane@monash.edu (D.R.M.).

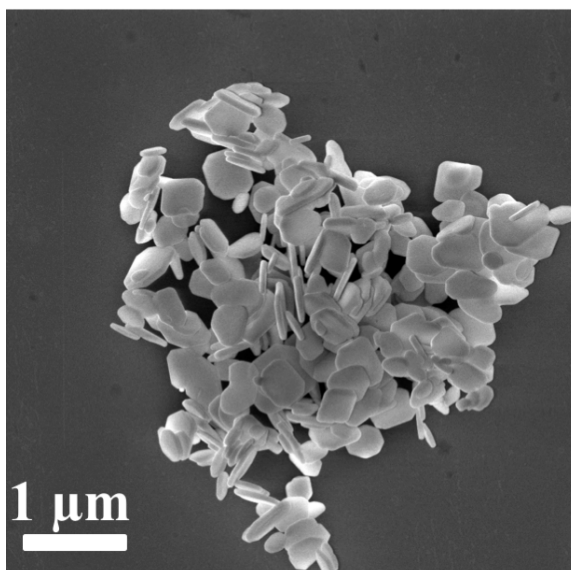

**Figure S1.** BSC NDs after activation treatment in PdCl<sub>2</sub> solution.

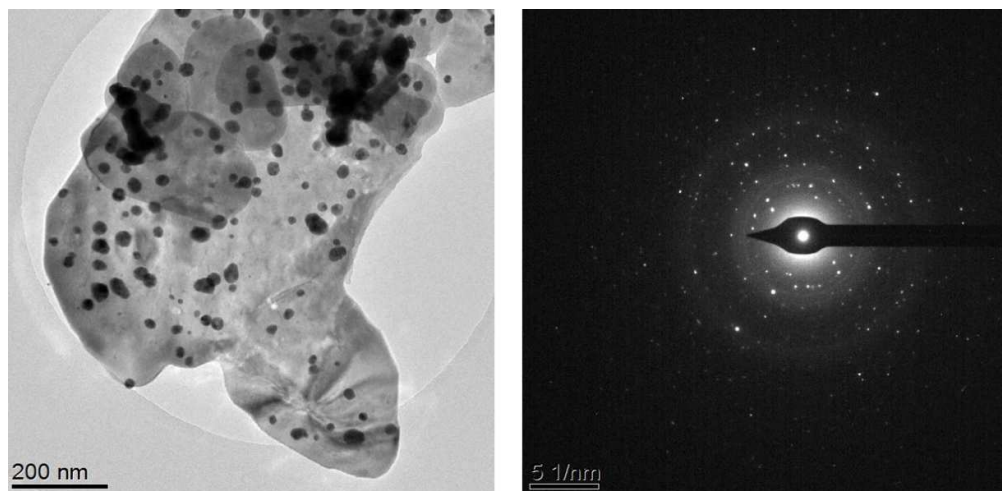

**Figure S2.** TEM images of Au/BSC and corresponding SAED pattern.

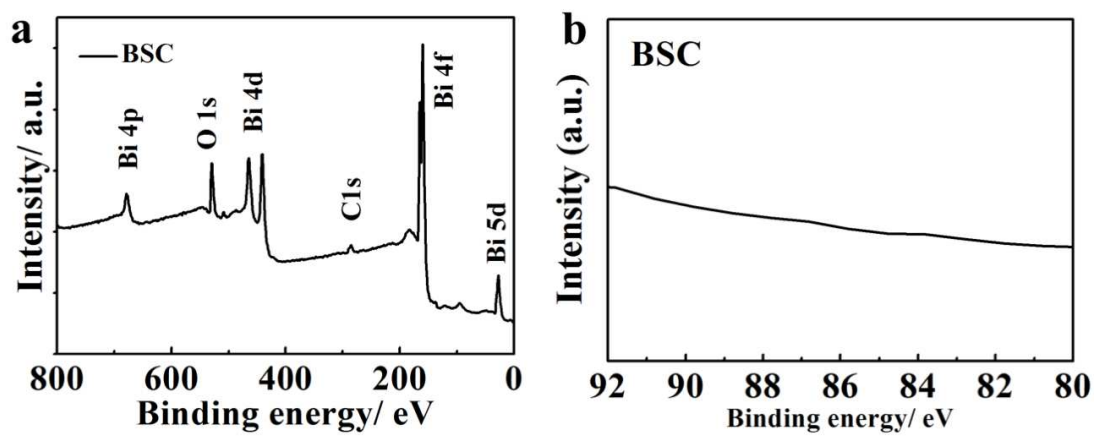

**Figure S3.** Full curve and high-resolution XPS spectra of BSC NDs.

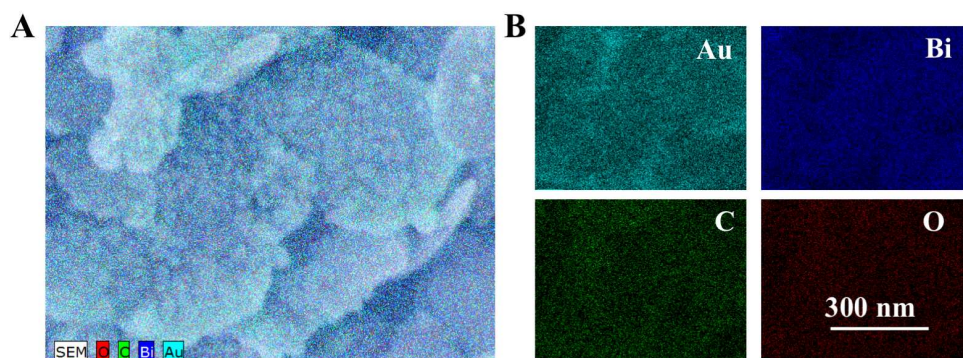

**Figure S4.** Elemental mapping of Au/BSC illustrating the uniform distribution of Au, Bi and O.

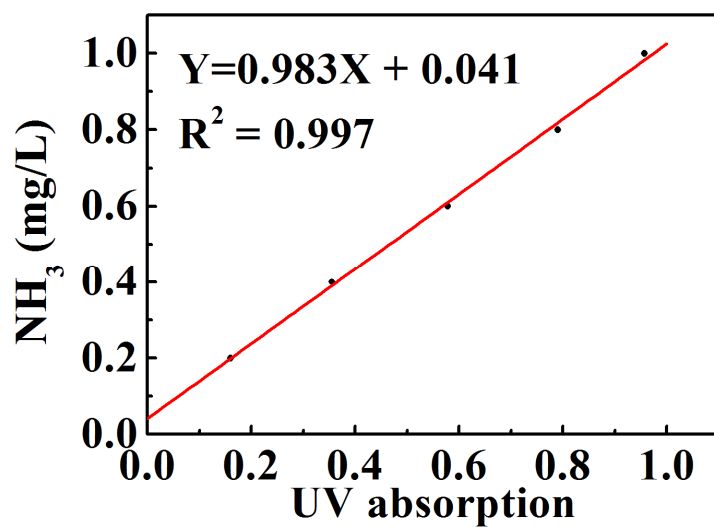

Figure S5. Calibration curve of the NH<sub>3</sub> standard solutions.
